# Supplementary material
Source: PubMed Central journal article supplement (PMC8109899)
Supplement: NIHPP2020.04.22.056283-supplement-1.pdf [file NIHPP2020.04.22.056283-supplement-1.pdf]

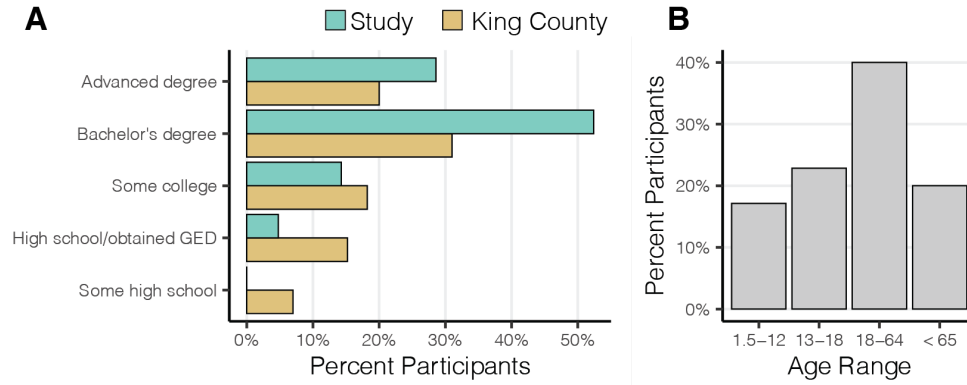

**Supplementary Figure 1. Educational attainment and age range of 35 swab usability study participants. (A)** The highest level of education attained by recruited participants (teal) versus King County, Washington (golden). **(B)** Percentage of recruited study participants in the displayed age ranges.

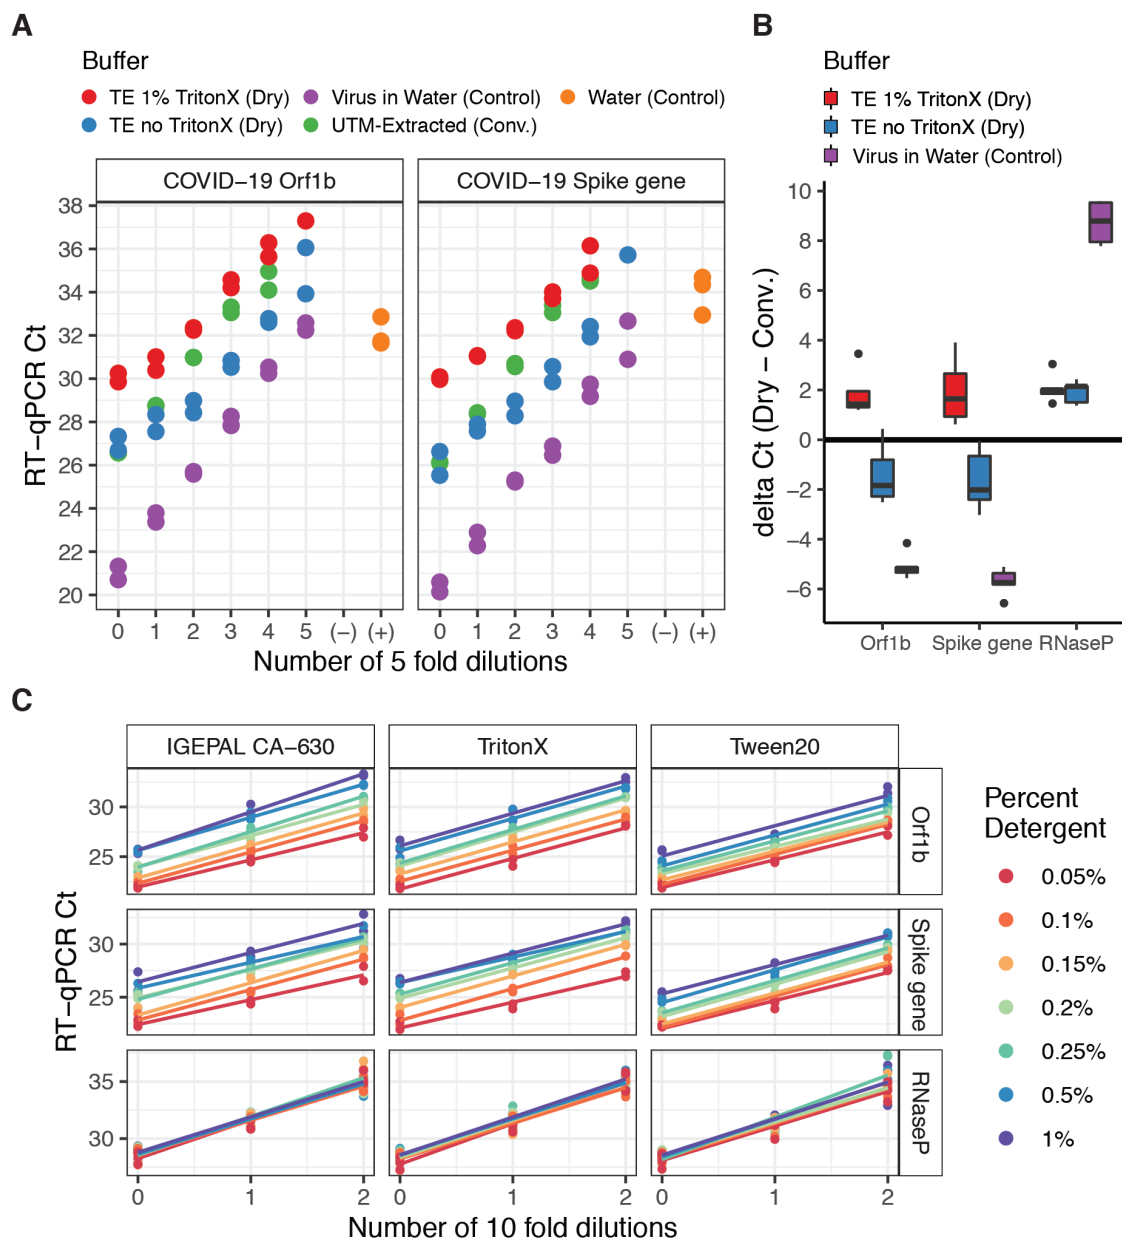

**Supplementary Figure 2. Comparison of RT-qPCR detection of inactivated virus from conventional and dry swabs.** (A) Crossing threshold (Ct) values shown for specimens comprising a self swab and inactivated SARS-CoV-2 virus for both the ORF1b primer-probe set (left) and the Spike gene primer-probe set (right). Colors correspond to unique combinations of extraction protocol or controls. All specimens were measured twice in independent RT-qPCR reactions. No template control (-) wells contained either buffer or water and positive control wells (+) contained synthetic template. (B) Delta Ct values between conventionally processed swabs and dry processed swabs at matched dilutions for this contrived experiment. (C) Ct values for three probes (rows: Orf1b, Spike, Rnase P) assayed in buffers containing one of three detergents (columns: IGEPAL CA-360, TritonX, Tween20) across ten-fold dilutions. Linear model (colored line) was fit for observations (colored points) at each detergent percent.

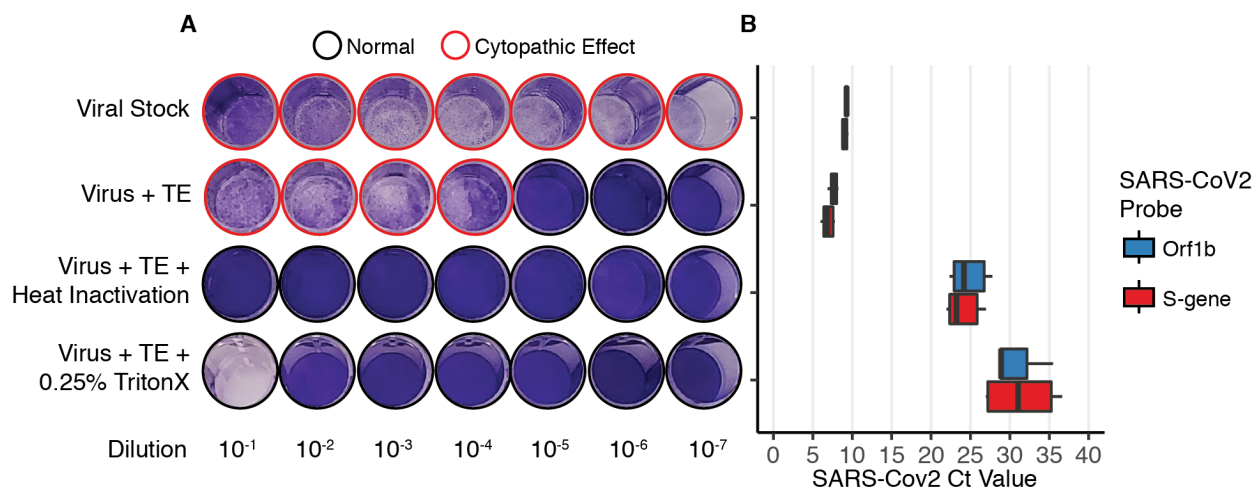

**Supplementary Figure 3. Comparison of heat treatment or detergent to inactivate**

**SARS-CoV-2.** (A) Crystal violet staining shows the cytopathic effects of SARS-CoV-2 dilutions on Vero cells after incubation with TE, TE + heat inactivation at 65°C for 10 minutes or TE + 0.25% Triton. (B) RT-qPCR Ct values of SARS-CoV-2 RNA isolated from Vero cells. Purified viral particles were first incubated with TE, TE + heat inactivation at 65°C for 10 minutes or TE + 0.25% TritonX.

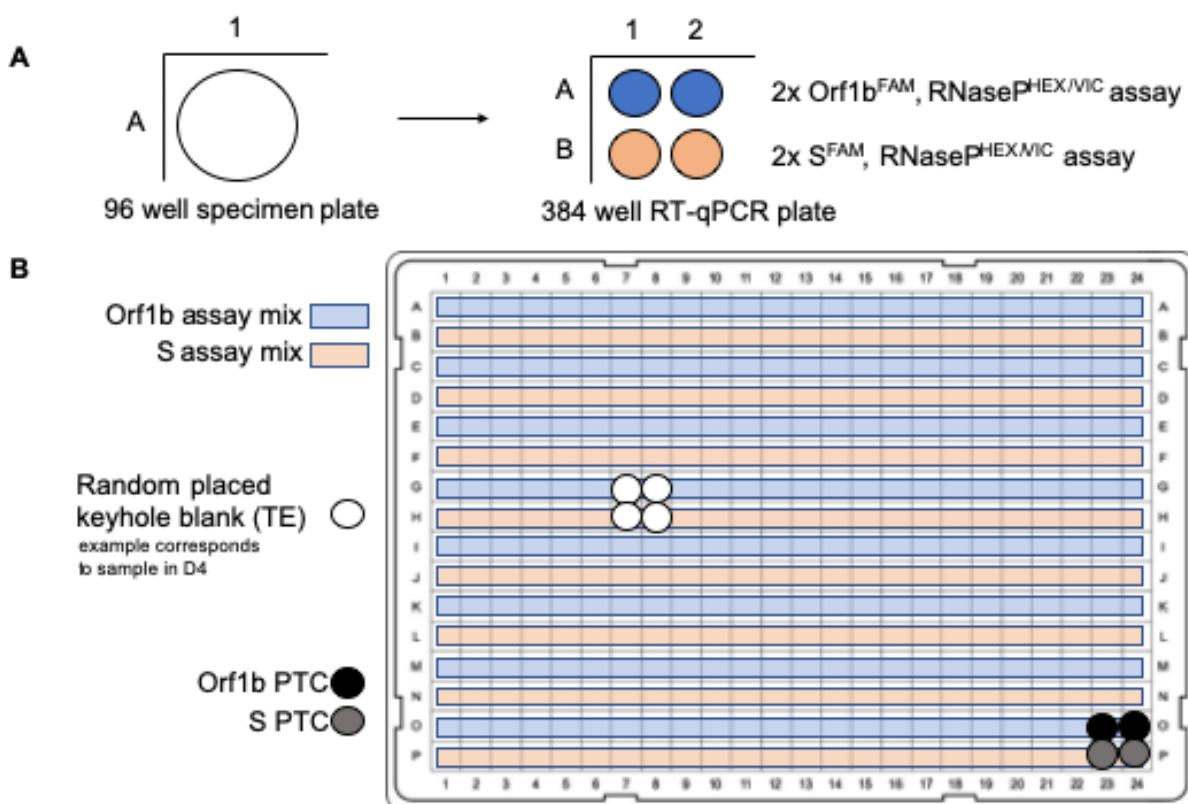

**Supplementary Figure S4. Plate layout of the Northwest Genomics Center SwabExpress RT-qPCR test.** (A) Each sample is loaded into 4 independent wells on a 96 well plate and tested in duplicate for the Orf1b and S-gene (Spike gene) primer/probes. (B) Included on every sample plate is a randomly positioned low-TE keyhole blank (white) and a positive template control (PTC) well containing synthetic SARS-CoV-2 template and human Hap1-RNA (black and grey).

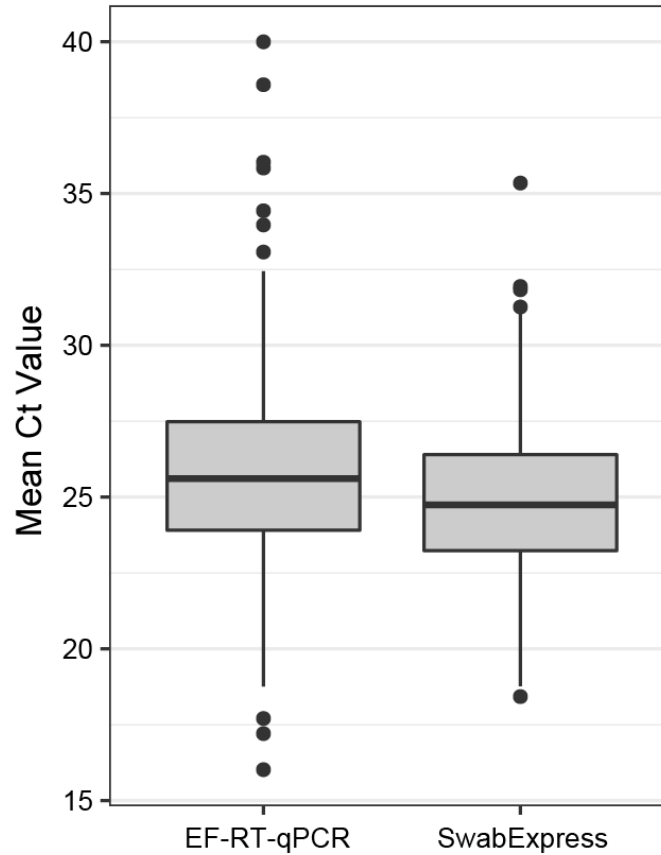

**Supplementary Figure S5. SwabExpress is more sensitive for RNase P than extraction-free RT-qPCR.** 1222 samples were tested in parallel by extraction-free RT-qPCR (EF-RT-qPCR) and SwabExpress. Samples run through the SwabExpress protocol, which includes a Proteinase K digestion, had lower mean RNase P Cts than the same samples run on EF-RT-qPCR.

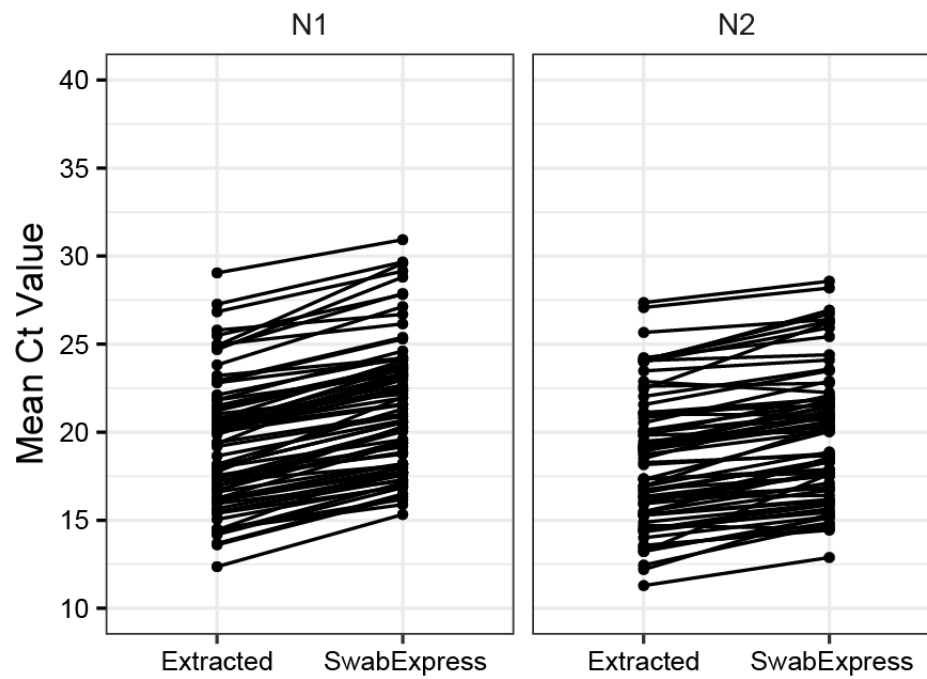

**Supplementary Figure 6. SwabExpress also works with the widely used CDC-N1 and CDC-N2 probesets.** Mean crossing threshold for 75 parallel specimens that were extracted or run through SwabExpress for the commonly used SARS-CoV-2 CDC N1 and N2 probe set.

**Table S1A. Age of study participants**

| Age Groups                          | Number | %    | Average Age<br>(within group) |
|-------------------------------------|--------|------|-------------------------------|
| Between 18 months - 12 years<br>old | 6      | 17%  | 8.7                           |
| Between 13 and 18 years old         | 8      | 23%  | 15.1                          |
| Between 18 and 64 years old         | 14     | 40%  | 40.7                          |
| Over 65 years old                   | 7      | 20%  | 68.3                          |
| TOTAL                               | 35     | 100% | 34.9                          |
| TOTAL                               | 35     | 100% | 34.9                          |

**Table S1B. Educational attainment of study participants**

| <b>Education Levels (of participants 18 &amp; over)</b>          |           |                         |                        |
|------------------------------------------------------------------|-----------|-------------------------|------------------------|
| <b>"What is your highest level of education obtained?"</b>       |           |                         |                        |
| <b>Response</b>                                                  | <b>N</b>  | <b>Participants (%)</b> | <b>King County (%)</b> |
| Less than high school graduate                                   | 0         | 0%                      | 7%                     |
| Graduated high school/obtained GED                               | 1         | 5%                      | 15%                    |
| Some college (including vocational training, associate's degree) | 3         | 14%                     | 18%                    |
| Bachelor's degree                                                | 11        | 52%                     | 31%                    |
| Advanced degree                                                  | 6         | 29%                     | 20%                    |
| <b>TOTAL</b>                                                     | <b>21</b> | <b>100%</b>             |                        |



**Table S1C. Household income of study participants**

| <b>Household Income</b>                                                                                                                                                                                                                        |    |                        |                 |
|------------------------------------------------------------------------------------------------------------------------------------------------------------------------------------------------------------------------------------------------|----|------------------------|-----------------|
| <i>“Please choose the range that best represents your household income last year (before taxes). If you are still considered a dependent for tax purposes, choose the range that describes your parent/legal guardian’s household income.”</i> |    |                        |                 |
| Response                                                                                                                                                                                                                                       | N  | Study participants (%) | King County (%) |
| Less than or equal to \$25,000                                                                                                                                                                                                                 | 0  | 0%                     | 12%             |
| Between \$25,001 to \$50,000                                                                                                                                                                                                                   | 0  | 0%                     | 14%             |
| Between \$50,001 to \$75,000                                                                                                                                                                                                                   | 1  | 2.9%                   | 14%             |
| Between \$75,001 to \$100,000                                                                                                                                                                                                                  | 7  | 20%                    | 12%             |
| Between \$100,001 to \$125,000                                                                                                                                                                                                                 | 4  | 11.4%                  | 19%             |
| Between \$125,001 to \$150,000                                                                                                                                                                                                                 | 3  | 8.6%                   |                 |
| Over \$150,000                                                                                                                                                                                                                                 | 16 | 45.7%                  | 29%             |
| Don't know                                                                                                                                                                                                                                     | 1  | 2.9%                   |                 |
| Prefer not to say                                                                                                                                                                                                                              | 3  | 8.6%                   |                 |
| TOTAL                                                                                                                                                                                                                                          | 35 | 100%                   |                 |

**Table S1D. Race of study participants**

| <i>“How would you describe your race? Check all that apply”</i> |    |                        |                 |
|-----------------------------------------------------------------|----|------------------------|-----------------|
| Response                                                        | N  | Study Participants (%) | King County (%) |
| American Indian or Alaska Native                                | 0  | 0%                     | <1%             |
| Asian                                                           | 10 | 24%                    | 17%             |
| Native Hawaiian or Pacific Islander                             | 0  | 0%                     | 1%              |
| Black or African American                                       | 0  | 0%                     | 6%              |
| White                                                           | 30 | 73%                    | 65%             |
| Other                                                           | 1  | 3%                     | 10%             |
| Prefer Not to Say                                               | 0  | 0%                     |                 |

**Table S2A. Sample collection and packaging checklist**

| <b>Sample Collection and Packaging Checklist and results</b> |     |      |
|--------------------------------------------------------------|-----|------|
|                                                              | Yes | %    |
| Able to locate and identify swab and tube                    | 35  | 100% |
| Used correct end of swab                                     | 35  | 100% |
| Sample both nostrils with same swab                          | 34  | 97%  |
| Swabbed 'fresh' nostril first                                | 35  | 100% |
| Swabbed nostrils in correct order                            | 33  | 94%  |
| Swabbed at least 5 circles in each nostril                   | 33  | 94%  |
| Swabbed for at least 10 seconds in each nostril              | 29  | 83%  |
| Wrote name & date on tube                                    | 34  | 97%  |
| Put tube into biohazard bag                                  | 35  | 100% |
| Able to locate and identify swab and tube                    | 35  | 100% |
| Used correct end of swab                                     | 35  | 100% |
| Swabbed 'fresh' nostril first                                | 35  | 100% |
| Sample both nostrils with same swab                          | 34  | 97%  |
| Inserted entire tip of the swab into the nostrils            | 35  | 100% |
| Swabbed at least 5 circles in each nostril                   | 33  | 94%  |
| Swabbed for at least 10 seconds in each nostril              | 32  | 91%  |
| Wrote name & date on tube                                    | 34  | 97%  |
| Put tube into biohazard bag                                  | 35  | 100% |
| Put biohazard bag into box                                   | 34  | 97%  |
| Put box into polmailer shipping bag                          | 34  | 97%  |

**Table S2B. Observed errors or unwanted outcomes during sample collection or packaging**

| <b>Did any of the following errors or reactions occur during observation?</b>   |          |          |
|---------------------------------------------------------------------------------|----------|----------|
|                                                                                 | <b>N</b> | <b>%</b> |
| Contaminated end of swabs with hand/fingers                                     | 0        | 0%       |
| Contaminated end of swabs by setting it down on a table or non-sanitary surface | 0        | 0%       |
| Did not put both tubes in biohazard bag                                         | 0        | 0%       |
| Did not put biohazard bag in box                                                | 1        | 3%       |
| Did not put box in polymailer shipping bag                                      | 1        | 3%       |
| Did not write name on tube                                                      | 0        | 0%       |
| Did not write date on tube                                                      | 0        | 0%       |
| Nose bleed                                                                      | 0        | 0%       |
| Sneezed during or after swabbing                                                | 4        | 11%      |
| Expressed frustration or confusion about one or more of the steps               | 3        | 9%       |
| Other*                                                                          | 2        | 6%       |

**Table S3. Summary of SwabExpress limit of detection (LoD) assay results.** Lowest concentration with 95% of the replicates detected for each probe is highlighted (in light grey) and bolded.

| Molecules / 5uL Reaction | Assay        | Percent Detected | Number of replicates | Number of replicates detected | Average Ct   | Standard deviation | %Coefficient of variation |
|--------------------------|--------------|------------------|----------------------|-------------------------------|--------------|--------------------|---------------------------|
| 5                        | Spike        | 50.0%            | 20                   | 10                            | 36.03        | 0.51               | 1.40%                     |
| 10                       | Spike        | 90.0%            | 20                   | 18                            | 34.22        | 0.65               | 1.90%                     |
| <b>20</b>                | <b>Spike</b> | <b>95.4%</b>     | <b>21</b>            | <b>22</b>                     | <b>34.49</b> | <b>0.47</b>        | <b>1.35%</b>              |
| 40                       | Spike        | 100%             | 24                   | 24                            | 33.76        | 0.94               | 2.78%                     |
| 80                       | Spike        | 100%             | 24                   | 24                            | 31.83        | 0.31               | 0.97%                     |
| 160                      | Spike        | 100%             | 24                   | 24                            | 30.36        | 0.23               | 0.76%                     |
| 320                      | Spike        | 100%             | 24                   | 24                            | 30.08        | 0.15               | 0.51%                     |
| 640                      | Spike        | 100%             | 24                   | 24                            | 28.86        | 0.27               | 0.92%                     |
| 5                        | Orf1b        | 85.0%            | 20                   | 17                            | 36.87        | 0.76               | 2.06%                     |
| <b>10</b>                | <b>Orf1b</b> | <b>100%</b>      | <b>20</b>            | <b>20</b>                     | <b>34.80</b> | <b>0.53</b>        | <b>1.52%</b>              |
| 20                       | Orf1b        | 100%             | 22                   | 22                            | 34.56        | 0.48               | 1.38%                     |
| 40                       | Orf1b        | 100%             | 24                   | 24                            | 33.94        | 0.50               | 1.48%                     |
| 80                       | Orf1b        | 100%             | 24                   | 24                            | 32.15        | 0.26               | 0.79%                     |
| 160                      | Orf1b        | 100%             | 24                   | 24                            | 31.01        | 0.24               | 0.77%                     |
| 320                      | Orf1b        | 100%             | 24                   | 24                            | 30.74        | 0.31               | 1.01%                     |
| 640                      | Orf1b        | 100%             | 24                   | 24                            | 29.56        | 0.28               | 0.94%                     |

**Table S4. Concordance between extracted nucleic acids and SwabExpress for 67 previously positive specimens.** Cts are displayed for extracted specimens and sorted on the first Orf1b Ct. Concordance between extraction and SwabExpress is depicted by color.

Key:

|  |                                                           |
|--|-----------------------------------------------------------|
|  | Extraction-free sample remained positive                  |
|  | Extraction-free sample became inconclusive (low positive) |
|  | Extraction-free sample became negative                    |

| Sample ID | Orf1B- Ct-1 | Orf1B- Ct-2 | S- Ct-1 | S- Ct-2 | RnaseP Avg Extracted | RnaseP Avg SwabExpress |
|-----------|-------------|-------------|---------|---------|----------------------|------------------------|
| e01b13c8  | 14.62       | 14.65       | 13.58   | 13.6    | 21.97                | 25.84                  |
| 2da728f7  | 14.8        | 14.68       | 14.24   | 13.95   | 24.06                | 27.19                  |
| 1f2ebd6a  | 15.01       | 15          | 13.95   | 14.1    | 23.39                | 26.38                  |
| 51a37bac  | 15.42       | 15.46       | 14.45   | 14.35   | 23.04                | 25.39                  |
| b537efd3  | 15.73       | 15.87       | 14.91   | 15.17   | 20.8                 | 25.47                  |
| b2b6a2a2  | 15.79       | 15.97       | 15.05   | 15.21   | 20.61                | 25.63                  |
| 9f966df1  | 16.91       | 17.01       | 16.01   | 15.75   | 24.07                | 26.84                  |
| cb477ce0  | 19.1        | 19.03       | 17.85   | 17.81   | 24.81                | 26.67                  |
| 48931452  | 20.22       | 20.36       | 19.36   | 19.6    | 20.42                | 26.37                  |
| f74f502b  | 20.92       | 21.01       | 19.87   | 20.06   | 22.82                | 26.00                  |
| 280825e0  | 21.05       | 21.05       | 20.54   | 20.42   | 28.66                | 31.08                  |
| 044ff3c0  | 21.59       | 21.43       | 20.56   | 20.52   | 25.17                | 28.38                  |
| 51ec40d2  | 22.46       | 22.62       | 21.86   | 22.24   | 22.96                | 27.04                  |
| 3c2ec020  | 22.86       | 22.89       | 22.23   | 22.29   | 24.03                | 27.16                  |
| c8b3da3d  | 23.29       | 23.52       | 22.9    | 22.97   | 23.55                | 28.96                  |
| 07e94a5c  | 24.8        | 24.83       | 23.86   | 24.28   | 24.99                | 30.45                  |
| f041d1a1  | 24.88       | 25.29       | 24.31   | 24.35   | 23.00                | 26.23                  |
| a7b9417b  | 25.29       | 25.16       | 24.73   | 24.69   | 22.91                | 24.38                  |
| 798a56e4  | 25.72       | 25.73       | 25.35   | 25.59   | 23.96                | 28.65                  |
| 4b911840  | 26          | 25.97       | 25.1    | 25.24   | 24.74                | 29.13                  |
| a55256ad  | 26.06       | 25.87       | 25      | 24.84   | 26.29                | 28.75                  |
| caab0ac2  | 26.12       | 26.1        | 25.91   | 25.81   | 25.07                | 27.64                  |
| 1c059acb  | 26.45       | 26.31       | 25.63   | 25.62   | 23.65                | 26.31                  |
| d93f3a66  | 26.66       | 26.85       | 26.35   | 26.19   | 20.11                | 25.23                  |
| 0b6c2d84  | 26.89       | 26.69       | 25.88   | 25.73   | 19.93                | 26.87                  |
| 4f8e6372  | 27          | 27.13       | 26.34   | 26.22   | 21.24                | 23.46                  |
| 8f579a44  | 27.38       | 27.51       | 26.03   | 26.57   | 25.22                | 27.20                  |
| 4f7bdaf8  | 27.56       | 27.55       | 26.7    | 26.73   | 26.97                | 30.24                  |
| 0b70294c  | 27.89       | 27.88       | 27.27   | 27.45   | 24.93                | 26.65                  |
| 51ffc347  | 28          | 28.13       | 27.73   | 27.4    | 25.06                | 28.00                  |

|          |       |       |       |       |       |       |
|----------|-------|-------|-------|-------|-------|-------|
| 351128f0 | 28.03 | 28.08 | 26.88 | 26.94 | 24.76 | 27.61 |
| dd2237f3 | 28.07 | 27.91 | 27.38 | 27.15 | 22.57 | 28.62 |
| f20f729b | 28.13 | 27.96 | 27.34 | 27.32 | 27.36 | 29.08 |
| 121170bd | 28.23 | 28.28 | 27.58 | 27.67 | 23.14 | 26.28 |
| bca72cde | 28.27 | 28.11 | 27.59 | 27.9  | 24.67 | 28.57 |
| 3ec5746c | 28.42 | 28.29 | 28.15 | 27.73 | 25.17 | 28.35 |
| 9652a0dc | 28.62 | 28.71 | 28.28 | 28.16 | 23.42 | 28.35 |
| cc9b3e0c | 28.75 | 29.12 | 28.85 | 28.45 | 21.88 | 26.41 |
| a9589b19 | 29.04 | 29.06 | 28.52 | 28.95 | 25.20 | 28.29 |
| ed0e2c9a | 29.1  | 29.27 | 27.85 | 28.11 | 19.25 | 26.24 |
| 22fab3d3 | 29.12 | 29.14 | 27.76 | 27.82 | 24.27 | 27.59 |
| 3f813b87 | 29.72 | 29.55 | 28.8  | 28.43 | 21.90 | 27.62 |
| a30c9e54 | 30.29 | 30.18 | 28.99 | 29.47 | 20.88 | 27.34 |
| a1494050 | 30.29 | 30.49 | 29.72 | 29.96 | 22.86 | 27.54 |
| 803bfb86 | 30.31 | 30.41 | 29.58 | 29.63 | 27.24 | 28.73 |
| cf79667b | 30.42 | 30.56 | 29.36 | 28.84 | 20.89 | 24.46 |
| 5200ef6a | 30.46 | 30.37 | 29.49 | 29.68 | 23.39 | 27.74 |
| 9a00d505 | 30.7  | 30.5  | 29.47 | 29.34 | 20.15 | 26.86 |
| 39657634 | 31.23 | 30.97 | 31.41 | 31.75 | 19.54 | 23.94 |
| f8f389df | 31.41 | 31    | 30.63 | 30.7  | 23.43 | 29.20 |
| 63d028e6 | 31.52 | 31.53 | 30.82 | 30.62 | 25.46 | 28.81 |
| 355a78c4 | 31.65 | 31.23 | 31.32 | 30.47 | 23.39 | 28.17 |
| 97d353f1 | 31.68 | 32.41 | 30.78 | 31.01 | 28.49 | 31.37 |
| 474d55b3 | 32.02 | 31.33 | 30.56 | 31.27 | 22.17 | 28.63 |
| 39882ea0 | 32.16 | 32    | 31.94 | 32.21 | 22.83 | 26.42 |
| f5fae9a7 | 32.18 | 32.21 | 31.44 | 31.41 | 25.17 | 27.93 |
| 895f8f73 | 32.76 | 32.22 | 32.24 | 31.32 | 21.01 | 27.37 |
| 8f31d7b3 | 32.78 | 33.35 | 32.62 | 32.63 | 25.96 | 29.60 |
| b4777cdd | 33.02 | 32.56 | 32.47 | 31.97 | 25.58 | 28.47 |
| ff1c66fd | 33.28 | 32.93 | 34.6  | 35.74 | 26.14 | 27.45 |
| aa32401d | 33.35 | 33.04 | 38.11 | Undet | 23.25 | 27.07 |
| 811bd6d9 | 33.36 | 32.98 | 31.88 | 31.76 | 22.54 | 26.06 |
| b20645cd | 33.71 | 34.27 | 32.08 | 33.28 | 23.70 | 28.43 |
| 928a60db | 34.81 | 34.93 | 33.7  | 33.93 | 25.16 | 29.35 |
| ab1ad199 | 34.92 | 33.7  | 37.34 | 33.43 | 24.05 | 27.20 |
| d6eb2c9e | 34.87 | Undet | 34.61 | 38.88 | 24.84 | 28.29 |
| 2491f402 | 36.32 | 35.26 | Undet | 34.25 | 25.83 | 30.73 |

**Table S5. Concordance of 619 AN specimens between KingFisher nucleic acids extraction (KF) and EF-RT-qPCR (EF).**

|                                      | Plate 1<br>COV119 |    | Plate 2<br>RIP107 |    | Plate 3<br>COV120 |    | Plate 4<br>RIP108 |    | Plate 5<br>RIP109 |    | Plate 6<br>RIP112 |    | Plate 7<br>COV179  |    |
|--------------------------------------|-------------------|----|-------------------|----|-------------------|----|-------------------|----|-------------------|----|-------------------|----|--------------------|----|
| <b>Swab collection type</b>          | Observed          |    | At-home           |    | Observed          |    | At-home           |    | At-home           |    | At-home           |    | Observed , at-home |    |
| <b>Date</b>                          | Oct 26            |    | Oct 26            |    | Oct 26            |    | Oct 27            |    | Oct 27            |    | Oct 28            |    | Nov 8              |    |
| <b>Operator</b>                      | SC                | SC | EM                | EM | EM                | EM | WZ                | WZ | WZ                | WZ | BB                | BB | BB                 | BB |
| <b>QuantStudio</b>                   | 1                 | 2  | 1                 | 2  | 1                 | 2  | 1                 | 2  | 1                 | 2  | 2                 | 1  | 1                  | 2  |
| <b>Clinical result</b>               | KF                | EF | KF                 | EF |
| <b>Positive</b>                      | 0                 | 0  | 4                 | 4  | 0                 | 0  | 3                 | 2  | 0                 | 0  | 1                 | 1  | 1                  | 1  |
| <b>Low- positive (inconclusive )</b> | 1                 | 0  | 0                 | 0  | 0                 | 0  | 0                 | 2  | 1                 | 0  | 0                 | 0  | 0                  | 0  |
| <b>Negative</b>                      | 87                | 88 | 83                | 83 | 87                | 88 | 87                | 86 | 89                | 90 | 85                | 84 | 89                 | 89 |
| <b>RNase P failures</b>              | 0                 | 0  | 0                 | 0  | 1                 | 0  | 0                 | 0  | 0                 | 0  | 0                 | 1  | 0                  | 0  |
| <b>Total</b>                         | 88                | 88 | 87                | 87 | 88                | 88 | 90                | 90 | 90                | 90 | 86                | 86 | 90                 | 90 |



**Table S6. Concordance of prospectively collected swab specimens with or without extraction**

|                                    |              | <b>SARS-CoV-2 test with<br/>KingFisher nucleic acids extraction</b> |              |          |           |
|------------------------------------|--------------|---------------------------------------------------------------------|--------------|----------|-----------|
|                                    |              | positive                                                            | inconclusive | negative | test fail |
| <b>SwabExpress</b>                 | positive     | 8                                                                   | 0            | 0        | 0         |
|                                    | inconclusive | 1                                                                   | 0            | 1        | 0         |
|                                    | negative     | 0                                                                   | 2            | 605      | 1         |
|                                    | test fail    | 0                                                                   | 0            | 1        | 0         |
| Total                              |              | 9                                                                   | 2            | 607      | 1         |
| positive agreement (9/9)           |              | 100%                                                                |              |          |           |
| inconclusive agreement (0/2)       |              | 0%                                                                  |              |          |           |
| negative agreement (605/606)       |              | 99.8%                                                               |              |          |           |
| failed due to poor quality (1/619) |              | 0.16%                                                               |              |          |           |

**Table S7. Comparison of Ct values for SARS-CoV-2 targets from specimens by the SARS-CoV-2 test with KingFisher extraction (KF) and SwabExpress (EF)**

|                 | KF - Orf1b   | KF Spike     | EF - Orf1b   | EF - S gene  | KF              | EF              | ΔCt   | ΔCt   |
|-----------------|--------------|--------------|--------------|--------------|-----------------|-----------------|-------|-------|
| Clinical Sample | Mean ± SD    | Mean ± SD    | Mean ± SD    | Mean ± SD    | Clinical Result | Clinical Result | Orf1b | Spike |
| 87359aac        | 36.85 *      | 38.32 *      | undet        | undet        | incon           | neg             | N/A   | N/A   |
| 7bd7b5e1        | 27.41 ± 0.11 | 25.42 ± 0.08 | 29.92 ± 0.00 | 29.05 ± 0.03 | pos             | pos             | 2.51  | 3.63  |
| d0023767        | 26.07 ± 0.01 | 25.48 ± 0.18 | 27.92 ± 0.11 | 27.15 ± 0.13 | pos             | pos             | 1.85  | 1.67  |
| 4757675b        | 29.62 ± 0.11 | 27.95 ± 0.10 | 30.25 ± 0.02 | 28.61 ± 0.42 | pos             | pos             | 0.63  | 0.66  |
| 7a22a1f3        | 27.88 ± 0.13 | 27.1 ± 0.21  | 28.67 ± 0.14 | 27.51 ± 0.06 | pos             | pos             | 0.79  | 0.41  |
| 57f5bb53        | 13.50 ± 0.11 | 12.55 ± 0.45 | 15.66 ± 0.05 | 15.04 ± 0.35 | pos             | pos             | 2.16  | 2.49  |
| 19344233        | 20.18 ± 0.04 | 19.31 ± 0.23 | 21.66 ± 0.03 | 21.25 ± 0.11 | pos             | pos             | 1.48  | 1.94  |
| f343051c        | 35.22 ± 0.92 | 34.82 ± 0.03 | 36.03 ± 0.36 | undet        | pos             | incon           | 0.81  | NA    |
| cc80131a        | undet        | undet        | undet        | 39.28 ± 0.60 | neg             | incon           | NA    | NA    |
| aef02e4c        | 36.6 *       | 39.05 *      | undet        | undet        | incon           | neg             | NA    | NA    |
| 20e0f036        | 25.44 ± 0.16 | 24.21 ± 0.08 | 29.71 ± 0.29 | 29.50 ± 0.02 | pos             | pos             | 4.27  | 5.29  |
| 6b496def        | 16.92 ± 0.03 | 16.08 ± 0.13 | 20.07 ± 0.00 | 19.61 ± 0.38 | pos             | pos             | 3.15  | 3.53  |

\* only 1 replicate; pos - Positive; neg - Negative; incon - Inconclusive; undet - Undetermined Ct > 40

**Table S8. Summary of RNase P detection failure by sample (SwabExpress)**

| <b>RNase P reactions:</b>  | <b>Number of Specimens in group</b> |
|----------------------------|-------------------------------------|
| Failed 1 RNase P reaction  | 563                                 |
| Failed 2 RNase P reactions | 151                                 |
| Failed 3 RNase P reactions | 38                                  |
| Failed 4 RNase P reactions | 194                                 |

**Table S9. Counts of Spurious (Ct < 30) SARS-CoV-2 amplification from EF-RT-qPCR**

| <b>Target</b> | <b>Number of specimens with one well of spurious amplification</b> |
|---------------|--------------------------------------------------------------------|
| Orf1b         | 35                                                                 |
| S gene        | 194                                                                |

**Table S10. Comparison of RNase P detection failure with and without Proteinase K (PK) digestion**

|              |                            | <b>EF-RT-qPCR (-PK)<br/>RNase P<br/>amplification</b> | <b>SwabExpress (+PK)<br/>RNase P<br/>amplification</b> |
|--------------|----------------------------|-------------------------------------------------------|--------------------------------------------------------|
| <b>Plate</b> | <b>Instance<br/>Number</b> | <b># wells amplified/total<br/># wells</b>            | <b># wells amplified/total<br/># wells</b>             |
| COV320       | 1                          | 3/4                                                   | 4/4                                                    |
| COV326       | 1                          | 3/4                                                   | 4/4                                                    |
| COV331       | 1                          | 1/4                                                   | 4/4                                                    |
|              | 2                          | 0/4                                                   | 4/4                                                    |
|              | 3                          | 4/4                                                   | 3/4                                                    |
|              | 4                          | 3/4                                                   | 4/4                                                    |
| COV351       | 1                          | 3/4                                                   | 4/4                                                    |
|              | 2                          | 3/4                                                   | 4/4                                                    |
|              | 3                          | 3/4                                                   | 4/4                                                    |
|              | 4                          | 3/4                                                   | 4/4                                                    |
|              | 5                          | 3/4                                                   | 4/4                                                    |
| COV352       | 1                          | 2/4                                                   | 4/4                                                    |
|              | 2                          | 1/4                                                   | 4/4                                                    |
|              | 3                          | 2/4                                                   | 4/4                                                    |
|              | 4                          | 3/4                                                   | 4/4                                                    |
|              | 5                          | 3/4                                                   | 4/4                                                    |
|              | 6                          | 3/4                                                   | 4/4                                                    |
| COV358       | 1                          | 3/4                                                   | 4/4                                                    |
|              | 2                          | 1/4                                                   | 4/4                                                    |
| COV360       | 1                          | 4/4                                                   | 3/4                                                    |
| total        |                            | 27/4888 (0.55%)                                       | 2/4888 (0.04%)                                         |

**Table S11. Concordance of clinical results for specimens with total nucleic acids extraction (Kingfisher Flex), heat treatment (EF-RT-qPCR) or Proteinase K digestion plus heat treatment (SwabExpress)**

|                    | Sample Prep Method |            |             |
|--------------------|--------------------|------------|-------------|
| Qualitative Result | KingFisher Flex    | EF-RT-qPCR | SwabExpress |
| # Positive         | 23                 | 24         | 28          |
| # Inconclusive     | 3                  | 3          | 0           |
| # Negative         | 4                  | 3          | 2           |

**Table S12. Concordance of prospectively collected swab specimens from participants with or without extraction**

|                                     |              | <b>SARS-CoV-2 test with<br/>KingFisher nucleic acids extraction</b> |              |          |           |
|-------------------------------------|--------------|---------------------------------------------------------------------|--------------|----------|-----------|
|                                     |              | positive                                                            | inconclusive | negative | test fail |
| <b>SwabExpress</b>                  | positive     | 9                                                                   | 1            | 0        | 0         |
|                                     | inconclusive | 0                                                                   | 0            | 1        | 0         |
|                                     | negative     | 0                                                                   | 0            | 1157     | 1         |
|                                     | test fail    | 0                                                                   | 0            | 0        | 0         |
| Total                               |              | 9                                                                   | 1            | 1158     | 1         |
| positive agreement (9/9)            |              | 100%                                                                |              |          |           |
| inconclusive agreement (0/1)        |              | 0%                                                                  |              |          |           |
| negative agreement (1157/1158)      |              | 99.91%                                                              |              |          |           |
| failed due to poor quality (1/1169) |              | 0.08%                                                               |              |          |           |

**Table 13. Mean  $\pm$  SD of 75 positive specimens extracted on the Roche Magna Pure 96 (MP96) or processed SwabExpress (SE) protocol and amplified using the N1 and N2 CDC probe sets.**

| Probe | MP96<br>Mean $\pm$ SD | SwabExpress<br>Mean $\pm$ SD | $\Delta$ Ct<br>[SE-MP96] |
|-------|-----------------------|------------------------------|--------------------------|
| N1    | 19.22 $\pm$ 3.67      | 21.79 $\pm$ 4.33             | 2.57                     |
| N2    | 18.31 $\pm$ 3.73      | 19.80 $\pm$ 3.72             | 1.49                     |



**Table S14. SwabExpress per sample cost breakdown.** Values displayed in US dollars.

| <b>Item</b>       | <b>SwabExpress</b> |
|-------------------|--------------------|
| US Cotton #3 Swab | \$0.29             |
| Transport Tube    | \$0.61             |
| Barcode Stickers  | \$0.50             |
| Low TE            | \$0.05             |
| Proteinase K      | \$0.14             |
| RT-qPCR Reagents  | \$2.67             |
| Lab Consumables   | \$1.72             |
